# 1 Statistical classification of dynamic 2 bacterial growth with sub-inhibitory 3 concentrations of nanoparticles and its 4 implications for disease treatment

5 A-Andrew D Jones, III<sup>1,2</sup>, David Medina-Cruz<sup>1</sup>, Na Yoon (Julie) Kim<sup>1</sup>, Gujie Mi<sup>1</sup>, Caterina  
6 Bartomeu-Garcia<sup>1</sup>, Lorena Baranda-Pellejero<sup>1,3</sup>, Nicole Bassous<sup>1</sup>, and Thomas J. Webster<sup>1</sup>

7 <sup>1</sup>Department of Chemical Engineering, Northeastern University, Boston, MA, United States

8 <sup>2</sup>Department of Mechanical & Industrial Engineering, Northeastern University, Boston, MA,  
9 United States

10 <sup>3</sup>Superior Technical School of Chemical Engineering, Universitat Rovira I Virgili, Tarragona,  
11 Spain

12  
13 Nanoparticles are promising alternatives to antibiotics since nanoparticles are easy to  
14 manufacture, non-toxic, and do not promote resistance. Nanoparticles act via physical disruption  
15 of the bacterial membrane and/or the generation of high concentrations of reactive-oxygen  
16 species locally. Potential for physical disruption of the bacterial membrane may be quantified by  
17 free energy methods, such as the extended Derjuran-Landau-Verwey-Overbeek theory, which  
18 predicts the initial surface-material interactions. The generation of reactive-oxygen species may  
19 be quantified using enthalpies of formation to predict minimum inhibitory concentrations.  
20 Neither of these two quantitative structure-activity values describes the dynamic, *in situ*  
21 behavioral changes in the bacteria's struggle to survive. In this paper, borrowing parameters  
22 from logistic, oscillatory, and diauxic growth models, we use principal component analysis and  
23 agglomerative hierarchical clustering to classify survival modes across nanoparticle types and  
24 concentrations. We compare the growth parameters of 170 experimental interactions between  
25 nanoparticles and bacteria. The bacteria studied include *Escherichia coli*, *Staphylococcus aureus*,  
26 Methicillin-Resistant *Staphylococcus aureus*, *Staphylococcus epidermidis*, *Pseudomonas*  
27 *aeruginosa*, and *Helicobacter pylori*, and were tested across multiple concentrations of liposomal  
28 drug delivery systems, amphiphilic peptide, and silver and selenium nanoparticles. Clustering  
29 reveals specific pairs of bacteria and nanoparticles where the nanoparticle induced growth  
30 dynamics could potentially spread the infection through the development of resistance and  
31 tolerance. This rapid screening also shows that bacteria generated nanoparticles do not induce  
32 growth modes indicative of the development of resistance. This methodology can be used to  
33 rapidly screen for novel therapeutics that do not induce resistance before using more robust  
34 intracellular content screening. This methodology can also be used as a quality check on batch  
35 manufactured nanoparticles.

## 36 Introduction

37 The post-antibiotic world is creating an economic and medical crisis with over 2 million  
38 hospital infections and 99,000 deaths, at a cost of \$21 to \$34 billion dollars in the US alone.<sup>1,2</sup>  
39 Over 70% of hospital acquired infections are antibiotic resistant, some multi-drug resistant.  
40 Furthermore, after the introduction of a new antibiotic, it does not take long for bacteria to

41 acquire or develop resistance.<sup>3,4</sup> The discovery of new antibiotics is a slow process. This is, in  
42 part due, to a lack of incentives, the exhaustion of naturally derived antibiotics, and the  
43 biocompatibility of synthetic antibiotics.<sup>4</sup> Changes in how we prescribe antibiotics, an increase in  
44 hygiene, sanitation and food safety practices may attenuate the crisis, however longer lifespans  
45 and a higher number of patients will increase the total risk of infection.<sup>5</sup>

46 Nanoparticles (NPs) are a relatively recent weapon in the fight against infection, with over 50  
47 nanoscale drugs having been FDA approved already and many commercialized in the last 30  
48 years.<sup>6-9</sup> NPs may be designed to be, simultaneously, nontoxic, able to stay in the circulation and  
49 be cleared from the body, by modifying their size, shape, and charge.<sup>9</sup> This has resulted in bare  
50 and functionalized polymeric drug carriers that transport existing antibacterial agents at lower  
51 concentrations and specifically target bacteria, which leads to a greater treatment efficacy and  
52 fewer side-effects than when the drug is administered alone.<sup>6,10</sup> These carriers have lengthened  
53 the effective time existing antibiotics can be used, but have not fundamentally changed the  
54 antibiotic landscape.

55 Metallic and metal-oxide NPs, amphiphilic peptides, and nanotubes have been proposed in an  
56 effort to fundamentally change the antibiotic landscape.<sup>6</sup> Because these NPs can be rapidly  
57 realized from rational design relative to antibiotic development, most modeling efforts have  
58 focused on them.<sup>9,11</sup> However, many of the calculated and experimental parameters, such as  
59 clearance rates, have not translated well.<sup>9</sup> Furthermore, variability in size, shape and charge from  
60 manufacturing processes and between *in vitro*, *in vivo*, and *in situ* environments resulted in  
61 conflicting reports, as similarly composed NPs have been reported to be both toxic and nontoxic  
62 to human cells.<sup>9,12</sup> Furthermore, quality control of NP production is challenging without  
63 intentional development ecosystems,<sup>8</sup> necessitating fast screening tools, such as those used to  
64 check for antibiotic contamination.<sup>13,14</sup>

65 NP usefulness as antibiotics and their potential toxicity can be quickly screened if their  
66 mechanism of action is known. NPs are proposed to act through the release and/or production of  
67 chemical species, mechanical interference like poration or binding, and enhanced permeation  
68 leading to further mechanical or chemical cell damage<sup>15,16</sup>. Unlike many antibiotics, they will act  
69 even when the cell is not dividing. The enthalpy of formation of chemical species can predict  
70 antibacterial activity for metal oxides.<sup>15</sup> The enthalpy of formation does not account for protein  
71 coronas or other facets of the *in vivo* environment, nor describes innate or induced resistance.  
72 The extended Derjua-Landau-Verwey-Overbeek (XDLVO) theory can predict nanoparticle  
73 agglomeration, which is one method of antibiotic resistance.<sup>17,18</sup> XDLVO has also been used to  
74 predict adhesion of cells and proteins to surfaces.<sup>19</sup> XDLVO includes surface roughness, acid-  
75 base chemistry, through contact angle measurements and zeta-potential of bacteria, nanoparticles  
76 and the growth media. However, surface energy does not describe the release of chemical species  
77 and can be cumbersome as material-free energies cannot be tabulated like enthalpies. A robust  
78 understanding of membrane cell interaction has been built from molecular dynamic simulations  
79 of nanomaterial-biological interaction, however these simulations require extensive time and  
80 knowledge of the material.<sup>20</sup>

81 To overcome these limitations, statistical tools have been proposed to supplement the wide  
82 variety of uncharacterized nanoparticle/bacteria interactions.<sup>21</sup> For example, multivariate linear  
83 regression and linear discriminant analysis were used to distinguish the role of five material  
84 parameters on cell cytotoxicity.<sup>22</sup> Counter propagation artificial neural networks were recently  
85 used to study the cytotoxicity of 72 metal oxide nanoparticles against *E. coli* in the context of  
86 developing a framework for environmental and health regulation.<sup>23</sup>

87 Here, we follow methods similar to Sayes et al.,<sup>24</sup> combining principal component analysis  
88 and a clustering technique, specifically hierarchical agglomerative clustering, to differentiate the  
89 behaviors and classes of nanoparticle-bacteria interactions. Unlike many existing analyses, our  
90 dataset includes many different bacterial species and a combination of metallic and non-metallic  
91 nanoparticles. Furthermore, we apply the analysis to dynamic growth measurements similar to  
92 ASTM guide E2149-13a, instead of to a minimum inhibitory concentration, acknowledging the  
93 importance of time to both inhibition and resistance.<sup>2,25</sup> Furthermore, while time series  
94 measurements may not reveal a mechanism, they can narrow the window required for future  
95 mechanism searches. We explore five parameters derived from three distinct growth models:  
96 Gompertz', or Huang's, model of logistic growth; an underdamped model of oscillatory growth;  
97 and Liquori's model of diauxic or two-phase growth. We use various concentrations of  
98 commercial and green-synthesized metallic nanoparticles, amine-capped nanoparticles, bare and  
99 functionalized polymeric capsules containing nanoparticles and antibiotics. Using principal  
100 component analysis, we show that species and membrane structure cannot explain all the  
101 variance in nanoparticle-bacteria interactions, and that hierarchical agglomerative clustering  
102 reveals correlation in the behavior of unrelated NP-bacteria pairs.

## 103 Methods

104

105 In order to classify nanoparticle-bacteria interactions for their potential to induce resistance  
106 or to promote bacteria proliferation, we analyzed 170 published and non-published interactions  
107 studied in our lab. The duration of each interaction was 24 h in a plate reader. The growth curves  
108 were fit to two growth models that describe logistic growth, and to growth models that describe  
109 diauxic and oscillatory growth. The quantitative parameters from these models were then used in  
110 the principal component analysis, and the transformed quantities classified using hierarchical  
111 agglomerative clustering.

### 112 *Growth Model Selection*

113 Bacteria exposed to sub-inhibitory concentrations of nanoparticles can exhibit three  
114 growth behaviors, as shown in Figure 1. Logistic growth is seen under standard conditions and  
115 has been modeled with varying degrees of accuracy.<sup>26</sup> Diauxic, or two-phase, growth occurs  
116 when bacteria are able to use a secondary compound or have overcome an inhibitory  
117 compound.<sup>27</sup> It has also been identified as a sign of bacterial tolerance.<sup>28</sup> Oscillatory growth is  
118 predominately seen in predator/prey situations, although we also observed this behavior in some  
119 of our nanoparticle-bacteria interactions and it has been implicated in bacteria free-riding on  
120 other bacteria's resistance.<sup>29</sup>

121

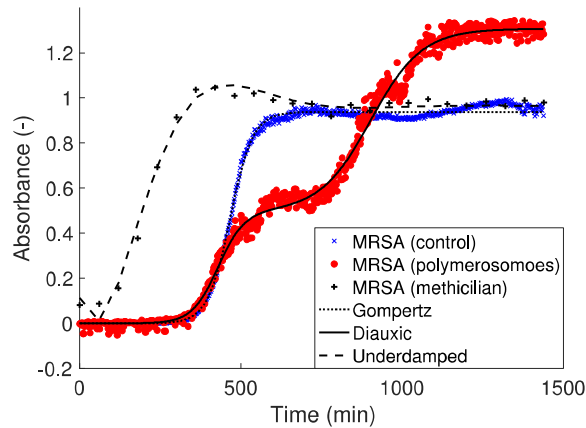

**Figure 1.** MRSA showing Gompertz, Diauxic, and underdamped oscillatory growth behavior when subjected to two different nanoparticles. Lag time, growth rate, carrying capacity, overshoot, and diauxic growth partition coefficient parameters can be extracted by fitting.

122  
123  
124  
125  
126  
127  
128  
129  
130

The modified Gompertz growth model,<sup>26,30</sup> Table 1.1, is known to accurately fit physical parameters of growth rate,  $\mu$ , and carrying capacity,  $A$ , where  $c_0$  is the initial concentration. However, while it has moderate success at modeling the lag-time,  $\lambda$ , its first derivative is never null and therefore cannot accurately predict the lag-time.

Huang's growth model<sup>26,31</sup>, Table 1.2, is also a three-parameter model, like Gompertz' model, but can model the lag-time. It has been shown it can predict parameters equivalent to the ones predicted by the more complex Baranyi's growth model.<sup>28</sup>

**Table 1.** Models used for fitting data and the free parameters extracted from each model. The first two equations model the same logistic growth behavior with varying degrees of reported accuracy, the latter two equations model two-phase and oscillatory growth respectively.

| #  | Source                    | Equation                                                                                                                                                                                                                                                                                                   | Free Parameters                                                                                       |
|----|---------------------------|------------------------------------------------------------------------------------------------------------------------------------------------------------------------------------------------------------------------------------------------------------------------------------------------------------|-------------------------------------------------------------------------------------------------------|
| 1. | Gompertz <sup>26,30</sup> | $c_0 + A \exp\left(-\exp\left(-\frac{\mu e}{A}(t - \lambda) + 1\right)\right)$                                                                                                                                                                                                                             | $c_0, A, \lambda, \mu$                                                                                |
| 2. | Huang <sup>26,31</sup>    | $c_0 + A - \log\left(e^{c_0} + (e^A - e^{c_0})e^{-\mu\left(t + \frac{1}{4}\log\frac{1+e^{-4(t-\lambda)}}{1+e^{4\lambda}}\right)}\right)$                                                                                                                                                                   | $c_0, A, \lambda, \mu$                                                                                |
| 3. | Liquori <sup>27</sup>     | $c_0 + Ax \frac{1 - \exp\left(-\frac{t}{t_{\alpha_1}}\right)}{1 - \exp\left(-\frac{t}{t_{\alpha_1}}\right) + \exp\left(-\frac{t}{t_{\alpha_2}}\right)} + A(1-x) \frac{1 - \exp\left(-\frac{t}{t_{\beta_1}}\right)}{1 - \exp\left(-\frac{t}{t_{\beta_1}}\right) + \exp\left(-\frac{t}{t_{\beta_2}}\right)}$ | $c_0, A, t_{\alpha_1}, t_{\alpha_2}, t_{\beta_1}, t_{\beta_2}, \mu$                                   |
| 4. | Oscillatory               | $c_0 + A - \frac{\mu}{\omega} e^{-\zeta\omega(t-\lambda')} \left(2\zeta \cos\left(\omega\sqrt{1-\zeta^2}(t-\lambda')\right) + \frac{2\zeta^2-1}{\sqrt{1-\zeta^2}} \sin\left(\omega\sqrt{1-\zeta^2}(t-\lambda')\right)\right)$                                                                              | $c_0, A, \lambda, \mu, \zeta, \omega$<br>$\lambda' = \lambda + \frac{A}{\mu} - \frac{2\zeta}{\omega}$ |

131  
132  
133  
134  
135  
136  
137  
138

The diauxic, or two-phase growth, is less commonly used in the literature,<sup>32</sup> and describes a secondary growth phase where bacteria are able to use a secondary nutrient source, or have overcome some inhibitory compound.<sup>33,34</sup> We have observed such growth dynamics with bacteria in the presence of nanoparticles. Liquori's diauxic growth model,<sup>27</sup> Table 1.3, was chosen over more accurate dynamic models of diauxic growth<sup>33-36</sup> because those other models require knowledge of substrate utilization and/or gene regulation. It is inappropriate to map the growth rates and lag-times of logistic growth onto diauxic growth as there are two phases where

139 those parameters exist. Among the seven parameters in the model in Table 1.3, the partition  
140 coefficient,  $x$ , describes whether the growth is dominated by the first phase or by the second  
141 phase, if the following criteria is met  $\frac{t_{\alpha_2}}{t_{\beta_1}} \ll 1$  and  $\frac{t_{\beta_2}}{t_{\alpha_1}} \ll 1$ .

142 Oscillatory growth describes the population overshooting, then oscillating about a  
143 carrying capacity. We derived biologically relevant parameters from the response of a second-  
144 order underdamped oscillator to a step-impulse, following the method of Zwietering et al.,<sup>30</sup> as  
145 shown in Table 1.4. The additional parameter,  $\omega$ , describes the frequency of oscillation about the  
146 carrying capacity. The damping ratio,  $\zeta$ , is used to find the population overshoot, the population  
147 growing beyond sustainable limits, from controls theory as,  $\%OS = \exp - \frac{\zeta\pi}{\sqrt{1-\zeta^2}}$ .

#### 148 *Model Fitting*

149 Models were fit using Trust-Region Reflective Least-Squared algorithm in MATLAB  
150 (Mathworks, Burlington, MA, USA). The lag-time, growth rate, and carrying capacity were  
151 constrained to physiological realistic, non-negative values. If possible, the parameters were  
152 initialized using results from a Levenberg-Marquardt fit of a logistic growth curve. Fits were  
153 accepted if  $R^2 > 0.8$ . The Akaike Information Criteria was used to determine which of the models  
154 produced the best fit taking into account the number of free parameters. Here, we approximated  
155 the log maximum likelihood,  $\log \hat{L} \approx n \log \sigma^2$ , with the number of samples times the log of the  
156 variance.

157

#### 158 *Experimental Conditions*

159 In this analysis, we used existing published and unpublished data from our lab to examine the  
160 effects of nanoparticle exposure to seven different species of bacteria. All experiments were  
161 conducted in a 96-well plate plate-reader (SpectraMaxV R ParadigmV R Multi-Mode Detection  
162 Platform) for 24 hours. Methicillin-Resistant *Staphylococcus aureus* (MRSA) (ATCC 43300)  
163 were grown in tryptic soy broth at 37 °C, exposed to liposomes containing methicillin, and  
164 functionalized with trans-activating transcriptional activator peptide. MRSA (ATCC 43300)  
165 were grown in tryptic soy broth at 37 °C, exposed to temperature responsive polymersomes,  
166 poly-DL-lactic acid-(carboxyethyl) polyethylene glycol (PDLLA-PEG-COOH), encapsulating  
167 methicillin or silver nanoparticles and/or functionalized with 40  $\mu$ M proline rich arginine. *E. coli*  
168 (ATCC 25922), *P. aeruginosa* (ATCC 27853), *S. epidermidis* (ATCC 35984), and *S. aureus*  
169 (ATCC 12600) were grown in tryptic soy broth at 37 °C, exposed to amphiphilic peptides, as  
170 previously reported.<sup>10</sup> *E. coli* and *S. aureus* were grown in LB broth at 37 °C, exposed to  
171 selenium nanoparticles produced by exposing *E. coli*, *P. aeruginosa*, *S. aureus* and MRSA to  
172 selenium salts, as previously reported.<sup>37</sup> *Helicobacter pylori* (NCTC 11637) were grown in  
173 tryptic soy broth at 21 °C, exposed to selenium nanoparticles produced by exposing *H. pylori* to  
174 1, 2, and 5 mM of Na<sub>2</sub>SeO<sub>3</sub>. *S. aureus*, MRSA, *E. coli*, MDR *E. coli* were grown in tryptic soy  
175 broth at 37 °C, exposed to glutathione capped nanoparticles, liposomal cysteine capped silver  
176 nanoparticles, liposomal glutathione capped silver nanoparticles, and cysteine capped silver  
177 nanoparticles. Detailed parameter pairs are included in SI Table 1.

#### 178 *Statistical Analysis*

179 We applied two statistical data mining techniques, principal component analysis and  
180 hierarchical agglomerative clustering, to classify the behavior of the nanoparticle-bacteria  
181 interaction. Each observation had, at most, five parameters: lag-time, growth rate, carrying  
182 capacity, overshoot, and partition coefficient, which are the features used in our principal  
183 component analysis; the empty observations were filled in with the mean value obtained from the

184 data set. We computed the relative lag-time, relative growth rate, and relative carrying capacity  
185 with respect to the control exposure, no nanoparticles, as  $(\xi - \xi_0)/\xi_0$ . As our control exposure  
186 exhibited logistic growth for all species and media tested, it would be inappropriate to compute a  
187 relative overshoot and relative partition coefficient, however those values are measured relative  
188 to a logistic growth or single-phase growth, respectively.

189 Using principal component analysis, we discovered nanoparticle-bacteria pairs that  
190 warrant further study and potentially rank interactions. The principal component analysis is an  
191 approach used to maximize variance and show patterns between features of a data set. As our  
192 data set includes many different species and nanoparticle type, we do not expect it to produce a  
193 quantitative structure-activity relationship. However, because our data set is the largest studied to  
194 date, we hypothesized that it might reveal behaviors that might have been hidden among the  
195 other features. We used a centered standardized covariance matrix as there were multiple  
196 bacteria-nanoparticle interactions that produced relative lag-times that were orders of magnitude  
197 greater than the mean.

198 In order to determine which types of nanoparticle-bacteria interactions are unique, we  
199 used a clustering algorithm, Hierarchical Agglomerative Clustering. Hierarchical agglomerative  
200 clustering measures the similarity between independent nanoparticle-bacteria interactions. We  
201 used Euclidian distance over a centroid linkage to measure similarity.

## 202 Results

203  
204 Our methodology establishes a fast screening technique for classifying bacteria growth  
205 behavior in the presence of nanoparticles, using as inputs measurements of bacteria growth by  
206 optical density. These inputs are used in principal component analysis and hierarchical  
207 agglomerative clustering to separate out nanoparticle-bacteria interactions that exhibit tolerant,  
208 resistant, or persistent behavior. We explore explanations based on membrane and particle type.  
209 We use two models that describe logistic growth, Gompertz' and Huang's models; a model that  
210 describes diauxic or two-phase growth, Liquori's model; and an oscillatory growth model. Using  
211 a best-fit approach, largest  $R^2$ , Liquori's growth model was selected as the model that best  
212 described a given behavior, except in cases of extreme oscillation. This is because there are  
213 seven free parameters instead of five free parameters of the oscillatory growth and three free  
214 parameters in Gompertz' and Huang's model. Using the Akaike Information Criteria,<sup>31,38</sup> with  
215 the log maximum likelihood approximated as,  $\log \hat{L} \approx n \log \sigma^2$ , with the number of samples  
216 times the log of the variance, Liquori's growth model still produces the best-fit as the parameter  
217 penalty is not large enough with respect to  $n$ , Figure 2a. Therefore, we assume a species can only  
218 be best-fit by Liquori's growth model if  $\frac{t_{\alpha_2}}{t_{\beta_1}}, \frac{t_{\beta_2}}{t_{\alpha_1}} \ll 1$  assuring a secondary plateau. Two-phase  
219 growth was exhibited by 52, or 30%, of the interactions spanning all the nanoparticle types  
220 except those generated by bacteria. If we exclude Liquori's model from consideration, Figure  
221 2b., Gompertz' growth model describes 59% of the interactions. Huang's model describes 16, or  
222 9%, of the interactions, providing better estimates of the lag-time. Similarly to Liquori's growth  
223 model, the penalty on the five parameters of the damped model is not large with respect to  $n$  as  
224 to discount its fits over the remaining 3 parameter models. However, if we include Liquori's  
225 growth model with the constraint previously proposed, this over fitting is reduced.

226

a.

b.

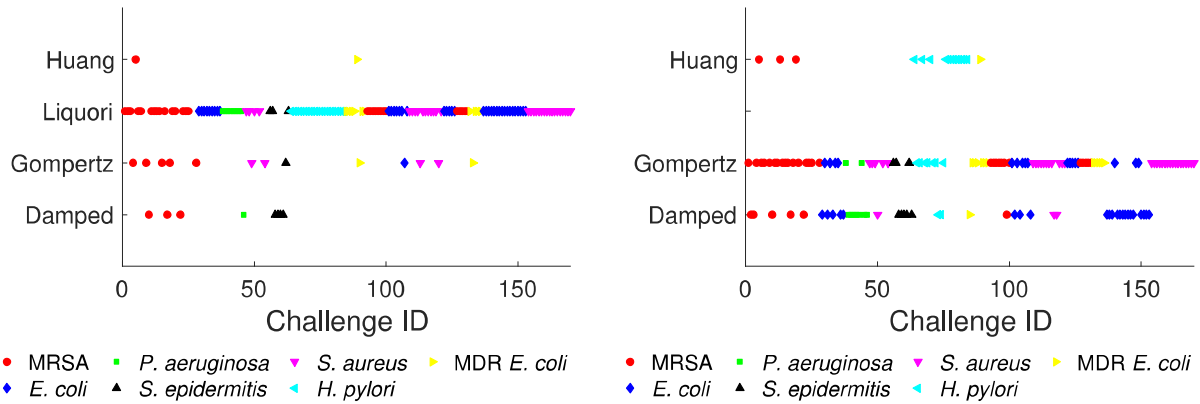

**Figure 2.** a. Minimum AIC of bacteria-nanoparticle interactions comparing all four growth models. b. Minimum AIC of bacteria-nanoparticle interactions excluding the Liquori's growth model for two-phase growth.

227 From the model fits described above, we were able to derive relative growth rate, lag-  
 228 time, and carrying capacity and report the percent overshoot and partition coefficient, Figure 3.  
 229 The relative lag-time, (Figure 3 or SI Figure 1), is a measure of the time delay that the  
 230 nanoparticles may induce if they possess antimicrobial properties. The high variance of the time  
 231 delay is expected given that some of the concentrations of the nanoparticles are near the  
 232 minimum inhibition concentration, while others do not possess antibacterial properties at all. We  
 233 did find some of the nanoparticles induced shorter lag-times, which may be useful in  
 234 combination therapies, as it has been found that higher metabolisms lead to greater susceptibility  
 235 to antibiotics. The high variance in relative growth rate (SI Figure 2) and carrying capacity (SI  
 236 Figure 3) are similarly understood as a function of near MIC concentrations. The percent  
 237 overshoot (SI Figure 4) and partition coefficient (SI Figure 5) are induced behaviors so their  
 238 relative quantities are meaningless. Furthermore, they are constrained to a range of [0,1] by  
 239 definition.  
 240

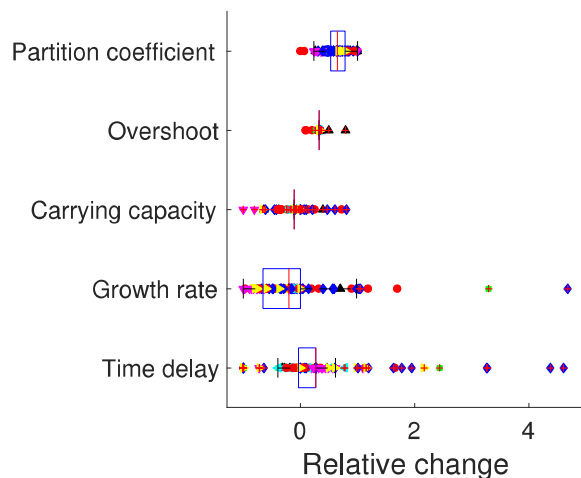

**Figure 3.** Box plot of the five parameters extracted from growth models of bacteria-nanoparticle interactions.

241 This work explores novel nanoparticles that do not have an easily quantifiable chemical  
 242 composition, such as selenium nanoparticles created by bacteria<sup>37</sup> or nanoparticles that require  
 243 computationally expensive molecular dynamic simulations, such as amphiphilic peptides.<sup>10</sup> This  
 244 precludes the use of input parameters used for metallic nanoparticles, however, we still follow  
 245

246 the methods of Sayes et al.,<sup>24</sup> regarding the use of the principal component analysis, and also use  
 247 clustering techniques. Our second objective was to develop a framework that will allow us to  
 248 predict the development of resistance or tolerance, without using the minimum inhibitory  
 249 concentration as an output. Instead, the input parameters to the model were taken from growth  
 250 curves. We used a centered parametric matrix as the input for principal component analysis to  
 251 account for the high variance in the data shown in Figure 3. As shown in the Pareto plot, Figure  
 252 4b, principal components 1 and 2 explain 50% of the variance with strong (> 30%) principal  
 253 component 1 dependence. The control interactions cluster near the origin as should be expected.  
 254 However, this breakdown also shows that these input parameters are not sufficient to explain the  
 255 variance. Furthermore, principal component analysis is a form of factor analysis that does not  
 256 produce quantitative explanations of the resulting factors. It is a data exploration tool that  
 257 requires further inspection to produce quantitative results.  
 258

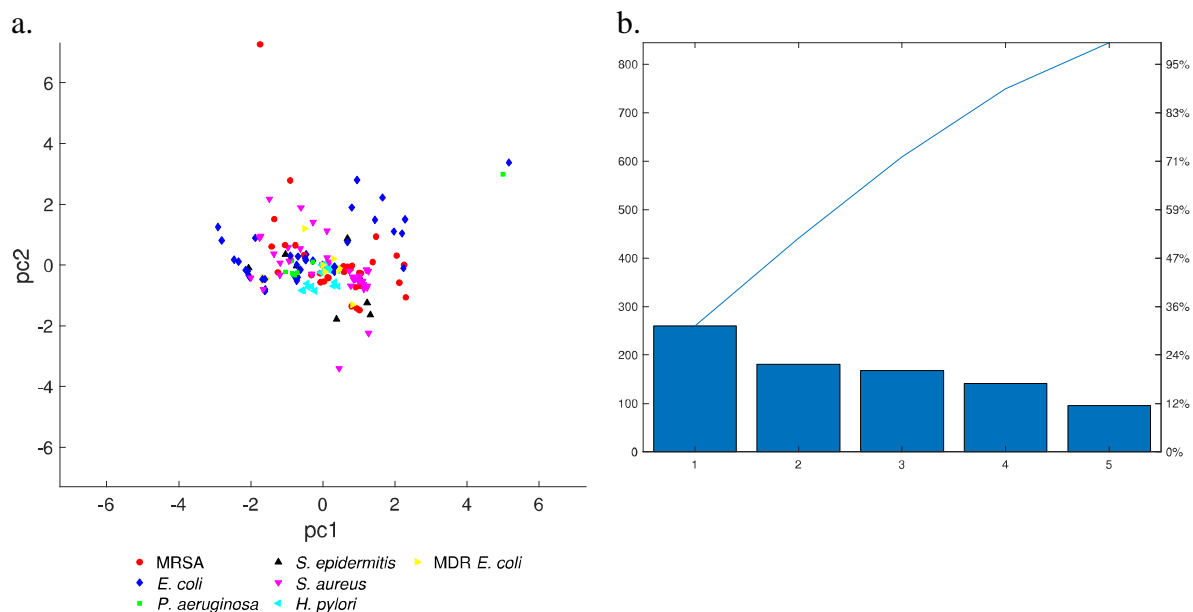

**Figure 4.** a. Principal component 1 versus principal component 2 plot highlighting bacterial species. b. Pareto plot of principal components shows pc1 and pc2 explain 50% of the variance of the data.

259 A clustering algorithm was used to further distinguish nanoparticle-bacteria interactions.  
 260 Using hierarchical agglomerative clustering with a centroid linkage, we distinguish 10 unique  
 261 clusters, Figure 5a. The clusters contain multiple species that do not correlate with the membrane  
 262 structure described by Gram-staining, as shown in Figure 5b. The clusters are initially described  
 263 by the predominate growth mode, as shown in Table 2.  
 264  
 265

**Table 2.** Descriptions of clusters predicted by hierarchical agglomerative clustering applied to the time-series growth parameters of bacteria interacting with nanoparticles.

| Cluster | Experimental ID | Predominate growth mode |
|---------|-----------------|-------------------------|
| 1       | 20              | Diauxic                 |
| 2       | 146,149         | Diauxic                 |
| 3       | 54              | Logistic                |
| 4       | 46,107          | Oscillatory             |



|    |                                                                                                                                                                                                                                   |                       |
|----|-----------------------------------------------------------------------------------------------------------------------------------------------------------------------------------------------------------------------------------|-----------------------|
| 5  | 100,103,105,106,122,123,124,125                                                                                                                                                                                                   | Logistic              |
| 6  | 4,25,90,109,110,112,115                                                                                                                                                                                                           | Logistic              |
| 7  | 2,3,6,24,29,30,31,32,33,34,35,36,39,40,41,42,43,44,47,48,50,52,59,61,63,65,68,71,73,74,75,85,86,88,91,93,94,99,108,113,117,118,119,120,126,138,139,140,141,142,143,144,145,147,148,150,151,152,158,159                            | Logistic, Diauxic     |
| 8  | 14,15,18,49,57,60,62,132                                                                                                                                                                                                          | Oscillatory           |
| 9  | 10,13,17,19,101                                                                                                                                                                                                                   | Oscillatory, Logistic |
| 10 | 1,5,7,11,12,16,22,23,28,37,38,45,56,58,64,66,67,69,70,72,76,77,78,79,80,81,82,83,84,87,92,95,96,97,98,102,104,111,114,116,121,127,128,129,130,131,133,134,135,136,137,154,155,156,157,160,161,162,163,164,165,166,167,168,169,170 | Logistic              |

266

267

268

269

270

271

272

273

274

275

276

277

278

279

280

281

282

283

284

285

286

287

288

289

290

291

292

293

294

295

296

297

Nanoparticle-bacteria interactions in clusters 4, 8, and 9 predominately exhibited oscillatory growth. The predominant species in these interactions is MRSA (47%) and the predominant nanoparticles are methicillin based nanoparticles (53%). Some of the interactions that visually appeared oscillatory were not classified by the fitting algorithm described above as oscillatory, for example, *E. coli* with cysteine capped silver nanoparticles (SI Table 1, EID 107), however, the additional parameters were sufficient to cluster them together. Other interactions have similarities that are hidden in the principal component analysis. The off-axis clustering is expected because this growth behavior is rare, but not desirable. Oscillatory growth has been found in the development of cooperative resistance of antibiotic treatment, when some parts of the population are resistant and others are “cheating.”<sup>29</sup>

The single-clusters, cluster 1 and cluster 3, are nearly inhibited interactions. MRSA exposed to a 3.3 µg/mL suspension of TAT coated liposomes (SI Table 1, EID 20) containing methicillin and resulting in diauxic growth exhibited a difference in absorbance of 0.2. *S. epidermidis* exposed to a 74.01 µg/mL suspension of amphiphilic peptides (SI Table 1, EID 54) exhibited a difference in absorbance of 0.06. In addition to the relative carrying capacity, a parameter expressing the absolute difference between initial and final cell density of colony forming units for future work could be used as a measure of inhibition, though such classification was not the intent of this study.

Cluster 5 predominately exhibits second growth phase dominate diauxic growth, with an average partition coefficient  $x = 0.69 \pm 0.13$ . Cluster 6 exhibits delayed logistic growth, including a 400%-time delay of MRSA in the presence of 1.7 µg/mL of TAT coated liposomes containing methicillin (SI Table 1, EID 25) with only a 3% change in carrying capacity. The predominate strain in cluster 5 is *E. coli*, 87.5%, while in cluster 6 is *S. aureus*, 57.1%. Both clusters predominately consist of liposome nanoparticles. It has been found that tolerant bacteria exhibit this diauxic growth.<sup>28,39</sup> However, as our results come from drug carrying liposomal nanoparticles it may be possible to add sugars or other metabolic treatments to reduce or eliminate this behavior further extending the usefulness of the drug treatment.<sup>40,41</sup>

The nanoparticle-bacteria interactions of selenium nanoparticles produced by bacteria are evenly split between clusters 7 and 10, though cluster 10 has more interactions in total (76 and 60 interactions, respectively). The additional interactions in cluster 10 are largely due to control species existing at the origin. Cluster 10 exhibits predominately logistic growth while cluster 7

298 splits between diauxic and logistic growth. As mentioned earlier, none of the bacteria produced  
299 nanoparticles induced diauxic growth.

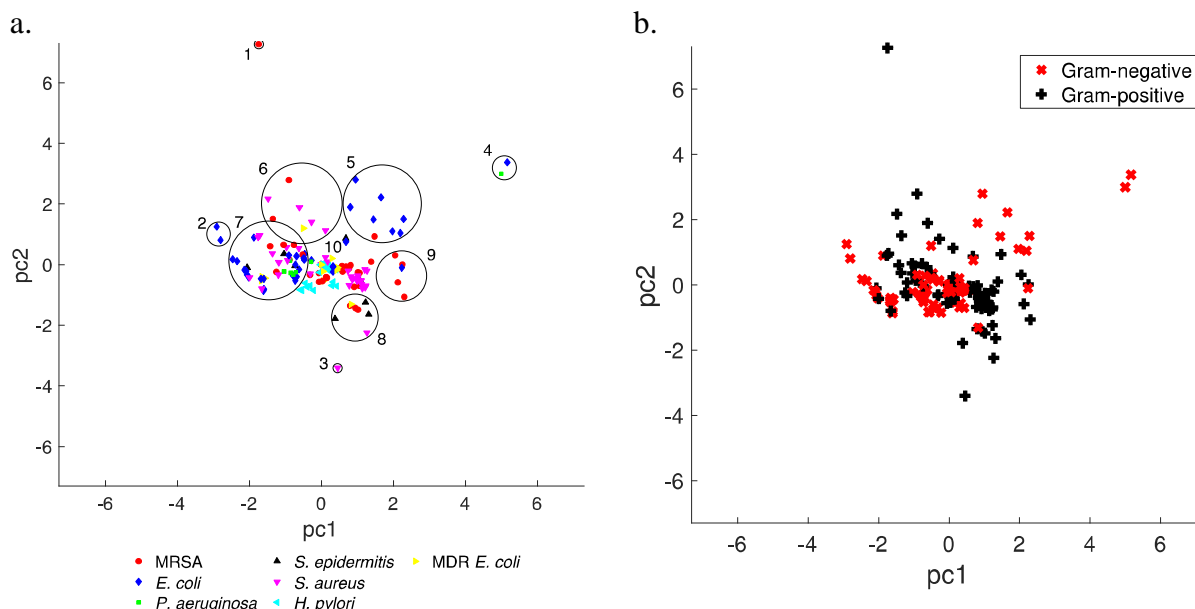

**Figure 5.** a. Hierarchical agglomerative clustering of the PCA transformed components using the centroid shows six distinct outliers surrounding a central cluster. The overlap in clusters 6 and 7 is strictly a function of the graphical representation. b. The membrane structure via Gram-stain overlaid onto the PCA shows weak correlation with the results from HAC.

## 300 Discussion

301

302 Here we present categorization of nanoparticle-bacteria interactions using principal  
303 component analysis and hierarchical agglomerative clustering. Unlike molecular dynamic  
304 simulations or machine learning methods, clustering methods do not require a physical  
305 understanding as inputs however, they do not provide mechanistic explanations. As our data  
306 show, our method does provide a rapid reduction of a large data set with many complex  
307 interactions to a smaller data set that can be further studied with additional tools.

308 Understanding the nanoparticle-bacteria interactions on industrial and medical nanoparticles  
309 is important in consequential life-cycle analysis in order to balance indirect changes in multiple  
310 systems.<sup>13,14</sup> A focus on time-series parameters, as opposed to inhibition, may support efforts to  
311 reduce the evolutionary selective pressure of future antibiotics.<sup>3</sup> For example, our finding that  
312 bacteria produced nanoparticles did not induce secondary growth may be useful in industrial and  
313 medical applications for regenerative medicine<sup>5</sup> even though we did not find significant  
314 antibacterial affects. Future work on categorizing bacteria-nanoparticle interactions from time-  
315 series extracted parameters may provide data enrichment for costly PCR monitoring of  
316 nanoparticle effects on mixed culture bacteria populations in nature, the human microbiome or  
317 wastewater activated sludge. In the same way that neural networks were used to propose  
318 recommendations for registration, evaluation, authorization, and restriction of chemicals  
319 legislation,<sup>23</sup> we have met four out of the five principles specified by the OECD.<sup>42</sup> Fast screening  
320 categorization can be used in quality control for properties such as size and surface charge,  
321 which correlate with the efficacy and persistence of the nanoparticles.<sup>6,8</sup>

322 Optical density measurements of bacterial growth time series are rapid and data rich,  
323 quantifying phenomena such as population overshoot or diauxic growth,<sup>32</sup> requiring minimal  
324 manual input as a fast screening method for nanoparticle-bacteria interaction. The data sparse  
325 quality of CFU counts hides information about intermediate phenomena, for example, treatment  
326 of hospital acquired strains of *P. aeruginosa* with silver NPs showed limited increasing growth at  
327 0.156 and 1.25  $\mu\text{g/mL}$ , and a sudden decrease at 5  $\mu\text{g/mL}$ .<sup>43</sup> Furthermore, this technique does not  
328 neglect agglomeration, surface charge, aqueous diameter, solubility, or protein coronas, which  
329 reduce the efficacy of nanoparticles *in vitro*. However, it is understood that there is not a one to  
330 one relationship between the optical density values and bacteria viability. Recently, dynamic  
331 light scattering was shown to be as accurate as plate counting to quantify viable cells, so it is  
332 foreseeable that DLS might be able to provide similar data with a one to one correlation with cell  
333 viability.<sup>44</sup> Therefore, while the data quality herein may not be transferable, the parameters and  
334 models used to extract time-series behavior for fast-screening of resistance development and  
335 other undesirable behavior of antibacterial agents are likely transferable.

336 In this study, we did not use quantitative descriptors of the nanoparticles, such as  
337 hydrodynamic diameter or zeta-potential. In future studies, the inclusion of particle  
338 hydrodynamic diameter ratios to minimum bacteria radius, and zeta-potentials ratios may  
339 provide further explanation of bacteria-nanoparticle behavior.

## 340 Conclusion

341 Principal component analysis and hierarchical agglomerative clustering were used to  
342 analyze data from over 100 experiments with bacteria exposed to nanoparticles in order to  
343 extract features and behaviors that are unique and warrant further study. The clusters did not map  
344 onto gram-staining. Instead, the clusters screened for certain bacteria nanoparticle interactions  
345 that exhibited oscillatory and diauxic growth, previously implicated in the development of drug  
346 resistance and tolerance. With 170 interactions, some bacteria-nanoparticle interactions that did  
347 not exhibit resistance or tolerance growth modes were clustered with those exhibiting resistance  
348 or tolerance, which warrants further study. We found that bacteria generated metallic  
349 nanoparticles do not induce tolerant growth behaviors, which would reduce the unintended  
350 consequences of nanostructured materials in medical devices, cosmetic, and industrial  
351 applications of nanoparticles. Some of the nanoparticles that did exhibit tolerant growth  
352 behaviors were liposomal nanoparticles encapsulating existing drugs or nanoparticles, and recent  
353 reports have shown that metabolic inputs may eliminate tolerant behavior. It may be possible to  
354 encapsulate metabolic inputs in liposomal nanoparticles extending the useful lifetime of the  
355 carrier and antibiotic. A rapid and accurate description of bacteria-nanoparticle interaction could  
356 be achieved by expanding our parameter extraction and statistical classification method on cell  
357 viability data using recently reported DLS methods to track cell division.

## 358 Data Availability

359 To encourage further machine learning applications, all the data is available.

## 360 Author Statement

361 AJ developed and implemented the data analysis and wrote the paper; DMC developed and  
362 performed experiments with bacteria derived metallic nanoparticles except as noted below; GM  
363 developed and performed experiments with amphiphilic peptides; LBP developed and performed  
364 experiments with *H. pylori* derived metallic nanoparticles; NB developed and performed

365 experiments with MRSA and the polymersomes; CGB and NYK developed and performed  
366 experiments with MRSA and liposomal NPs; TW proposed the analysis, advised on data  
367 collection and analysis. All authors have reviewed and revised the paper for accuracy.

## 368 References

- 369 1 Golkar, Z., Bagasra, O. & Pace, D. G. Bacteriophage therapy: a potential solution for the  
370 antibiotic resistance crisis. *The Journal of Infection in Developing Countries* **8**,  
371 doi:10.3855/jidc.3573 (2014).
- 372 2 Stone, R. M. L., Butler, M. S., Phetsang, W., Cooper, M. A. & Blaskovich, M.  
373 Fluorescent Antibiotics: New Research Tools to Fight Antibiotic Resistance. *Trends*  
374 *Biotechnol* **36**, 523-536, doi:10.1016/j.tibtech.2018.01.004 (2018).
- 375 3 Clatworthy, A. E., Pierson, E. & Hung, D. T. Targeting virulence: A new paradigm for  
376 antimicrobial therapy. *Nature Chemical Biology* **3**, 541-548,  
377 doi:10.1038/nchembio.2007.24 (2007).
- 378 4 Ventola, C. L. The antibiotic resistance crisis: part 1: causes and threats. *P & T : a peer-*  
379 *reviewed journal for formulary management* **40**, 277-283 (2015).
- 380 5 Roy, A. K., Jones, A.-A. D. & Webster, T. J. in *Translational Medicine: A Biomaterials*  
381 *Approach* (ed Lei Yang) 1-21 (Academic Press, 2019).
- 382 6 Mi, G., Shi, D., Wang, M. & Webster, T. J. Reducing Bacterial Infections and Biofilm  
383 Formation Using Nanoparticles and Nanostructured Antibacterial Surfaces. *Advanced*  
384 *Healthcare Materials* **1800103**, 1-23, doi:10.1002/adhm.201800103 (2018).
- 385 7 Ventola, C. L. Progress in Nanomedicine: Approved and Investigational Nanodrugs. *P &*  
386 *T : a peer-reviewed journal for formulary management* **42**, 742-755 (2017).
- 387 8 Jones, A. A. D., Mi, G. & Webster, T. J. A Status Report on FDA Approval of Medical  
388 Devices Containing Nanostructured Materials. *Trends in Biotechnology*,  
389 doi:10.1016/j.tibtech.2018.06.003 (2018).
- 390 9 Sanvicens, N. & Marco, M. P. Multifunctional nanoparticles – properties and prospects  
391 for their use in human medicine. *Trends in Biotechnology* **26**, 425-433,  
392 doi:10.1016/j.tibtech.2008.04.005 (2008).
- 393 10 Mi, G., Shi, D., Herchek, W. & Webster, T. J. Self-assembled arginine-rich peptides as  
394 effective antimicrobial agents. *Journal of Biomedical Materials Research - Part A* **105**,  
395 1046-1054, doi:10.1002/jbm.a.35979 (2017).
- 396 11 Petros, R. A. & DeSimone, J. M. Strategies in the design of nanoparticles for therapeutic  
397 applications. *Nature Reviews Drug Discovery* **9**, 615-627, doi:10.1038/nrd2591 (2010).
- 398 12 Sayes, C. & Ivanov, I. Comparative Study of Predictive Computational Models for  
399 Nanoparticle-Induced Cytotoxicity. *Risk Analysis* **30**, 1723-1734, doi:10.1111/j.1539-  
400 6924.2010.01438.x (2010).
- 401 13 Fjodorova, N., Novic, M., Gajewicz, A. & Rasulev, B. The way to cover prediction for  
402 cytotoxicity for all existing nano-sized metal oxides by using neural network method. 1-  
403 28, doi:10.1080/17435390.2017.1310949 (2017).
- 404 14 Rebitzer, G. *et al.* Life cycle assessment Part 1: Framework, goal and scope definition,  
405 inventory analysis, and applications. *Environ Int* **30**, 701-720,  
406 doi:10.1016/j.envint.2003.11.005 (2004).
- 407 15 Puzyn, T. *et al.* Using nano-QSAR to predict the cytotoxicity of metal oxide  
408 nanoparticles. *Nature Nanotechnology* **6**, 175-178, doi:10.1038/nnano.2011.10 (2011).

- 409 16 Taylor, E. & Webster, T. J. Reducing infections through nanotechnology and  
410 nanoparticles. *Int J Nanomed* **Volume 6**, 1463-1473, doi:10.2147/IJN.S22021 (2011).
- 411 17 Tang, J., Wu, Y., Esquivel-Elizondo, S., Sørensen, S. J. & Rittmann, B. E. How  
412 Microbial Aggregates Protect against Nanoparticle Toxicity. *Trends in Biotechnology* **xx**,  
413 1-12, doi:10.1016/j.tibtech.2018.06.009 (2018).
- 414 18 Panáček, A. *et al.* Bacterial resistance to silver nanoparticles and how to overcome it.  
415 *Nature Nanotechnology* **13**, 65-71, doi:10.1038/s41565-017-0013-y (2018).
- 416 19 Busscher, H. J. *et al.* Measurement of the surface free energy of bacterial cell surfaces  
417 and its relevance for adhesion. *Applied and Environmental Microbiology* **48**, 980-983  
418 (1984).
- 419 20 Liu, J. & Hopfinger, A. J. Identification of possible sources of nanotoxicity from carbon  
420 nanotubes inserted into membrane bilayers using membrane interaction quantitative  
421 structure- activity relationship analysis. *Chemical research in toxicology* **21**, 459-466  
422 (2008).
- 423 21 Butler, K. T., Davies, D. W., Cartwright, H., Isayev, O. & Walsh, A. Machine learning  
424 for molecular and materials science. *Nature* **559**, 547-555, doi:10.1038/s41586-018-  
425 0337-2 (2018).
- 426 22 Sayes, C. & Ivanov, I. Comparative Study of Predictive Computational Models for  
427 {Nanoparticle-Induced} Cytotoxicity. *Risk Anal* **30**, 1723-1734, doi:10.1111/j.1539-  
428 6924.2010.01438.x (2010).
- 429 23 Fjodorova, N., Novic, M., Gajewicz, A. & Rasulev, B. The way to cover prediction for  
430 cytotoxicity for all existing nano-sized metal oxides by using neural network method.  
431 *Nanotoxicology* **11**, 475-483, doi:10.1080/17435390.2017.1310949 (2017).
- 432 24 Sayes, C., Smith & Ivanov. A framework for grouping nanoparticles based on their  
433 measurable characteristics. *International Journal of Nanomedicine* **8**, 45,  
434 doi:10.2147/IJN.S40521 (2013).
- 435 25 Greulich, P., Doležal, J., Scott, M., Evans, M. & Allen, R. Predicting the dynamics of  
436 bacterial growth inhibition by ribosome-targeting antibiotics. *Phys Biol* **14**, 65005,  
437 doi:10.1088/1478-3975/aa8001 (2017).
- 438 26 Huang, L. IPMP 2013 - A comprehensive data analysis tool for predictive microbiology.  
439 *International Journal of Food Microbiology* **171**, 100-107,  
440 doi:10.1016/j.ijfoodmicro.2013.11.019 (2014).
- 441 27 Liquori, A. M., Monroy, A., Parisi, E. & Tripiciano, A. A theoretical equation for diauxic  
442 growth and its application to the kinetics of the early development of the sea urchin  
443 embryo. *Differentiation* **20**, 174-175 (1981).
- 444 28 Brauner, A., Fridman, O., Gefen, O. & Balaban, N. Q. Distinguishing between resistance,  
445 tolerance and persistence to antibiotic treatment. *Nature Reviews Microbiology* **14**, 320-  
446 330, doi:10.1038/nrmicro.2016.34 (2016).
- 447 29 Yurtsev, E. A., Chao, H. X., Datta, M. S., Artemova, T. & Gore, J. Bacterial cheating  
448 drives the population dynamics of cooperative antibiotic resistance plasmids. *Molecular*  
449 *Systems Biology* **9**, 1-7, doi:10.1038/msb.2013.39 (2013).
- 450 30 Zwietering, M., Jongenburger, I. & Rombouts. Modeling of the bacterial growth curve.  
451 *Applied and Environmental Microbiology* **56**, 1875-1881 (1990).
- 452 31 Huang, L. Optimization of a new mathematical model for bacterial growth. *Food Control*  
453 **32**, 283-288, doi:10.1016/j.foodcont.2012.11.019 (2013).

- 454 32 Wollenberg, M. *et al.* {Propionibacterium-Produced} Coproporphyrin {III} Induces  
455 Staphylococcus aureus Aggregation and Biofilm Formation. *Mbio* **5**, e01286-01214,  
456 doi:10.1128/mBio.01286-14 (2014).
- 457 33 Chu, D. Limited by sensing - A minimal stochastic model of the lag-phase during diauxic  
458 growth. *J. Theor. Biol.* **414**, 137-146, doi:10.1016/j.jtbi.2016.10.019 (2017).
- 459 34 Chu, D. F. In silico evolution of diauxic growth. *BMC Evolutionary Biology* **15**, 211,  
460 doi:10.1186/s12862-015-0492-0 (2015).
- 461 35 Cappuyns, A. M., Bernaerts, K., Vanderleyden, J. & Van Impe, J. F. A dynamic model  
462 for diauxic growth, overflow metabolism, and AI-2-mediated cell-cell communication of  
463 Salmonella Typhimurium based on systems biology concepts. *Biotechnology and*  
464 *Bioengineering* **102**, 280-293, doi:10.1002/bit.22044 (2009).
- 465 36 Casasús, A. I., Hamilton, R. K., Svoronos, S. A. & Koopman, B. A simple model for  
466 diauxic growth of denitrifying bacteria. *Water Res.* **39**, 1914-1920,  
467 doi:10.1016/j.watres.2005.03.014 (2005).
- 468 37 Medina Cruz, D., Mi, G. & Webster, T. J. Synthesis and characterization of biogenic  
469 selenium nanoparticles with antimicrobial properties made by Staphylococcus aureus,  
470 methicillin-resistant Staphylococcus aureus (MRSA), Escherichia coli, and Pseudomonas  
471 aeruginosa. *Journal of Biomedical Materials Research - Part A* **106**, 1400-1412,  
472 doi:10.1002/jbm.a.36347 (2018).
- 473 38 Akaike, H. *Selected Papers of Hirotugu Akaike*. 1 edn, (Springer New York, 1998).
- 474 39 Levin-Reisman, I. *et al.* Antibiotic tolerance facilitates the evolution of resistance.  
475 *Science* **355**, 826-830, doi:10.1126/science.aaj2191 (2017).
- 476 40 Gutierrez, A. *et al.* Understanding and Sensitizing Density-Dependent Persistence to  
477 Quinolone Antibiotics. *Molecular Cell* **68**, 1147-1154.e1143,  
478 doi:10.1016/j.molcel.2017.11.012 (2017).
- 479 41 Meylan, S., Andrews, I. W. & Collins, J. J. Targeting Antibiotic Tolerance, Pathogen by  
480 Pathogen. *Cell* **172**, 1228-1238, doi:10.1016/j.cell.2018.01.037 (2018).
- 481 42 OECD. *Guidance Document on the Validation of (Quantitative) Structure-Activity*  
482 *Relationship [(Q)SAR] Models*. (2014).
- 483 43 Salomoni, R., Léo, P., Montemor, A. F., Rinaldi, B. G. & Rodrigues, M. F. A.  
484 Antibacterial effect of silver nanoparticles in Pseudomonas aeruginosa. *Nanotechnol Sci*  
485 *Appl* **10**, 115-121, doi:10.2147/NSA.S133415 (2017).
- 486 44 Vargas, S., Millán-Chiu, B. E., Arvizu-Medrano, S. M., Loske, A. M. & Rodríguez, R.  
487 Dynamic light scattering: A fast and reliable method to analyze bacterial growth during  
488 the lag phase. *Journal of Microbiological Methods* **137**, 34-39,  
489 doi:10.1016/j.mimet.2017.04.004 (2017).

490  
491

492 Supplementary Information

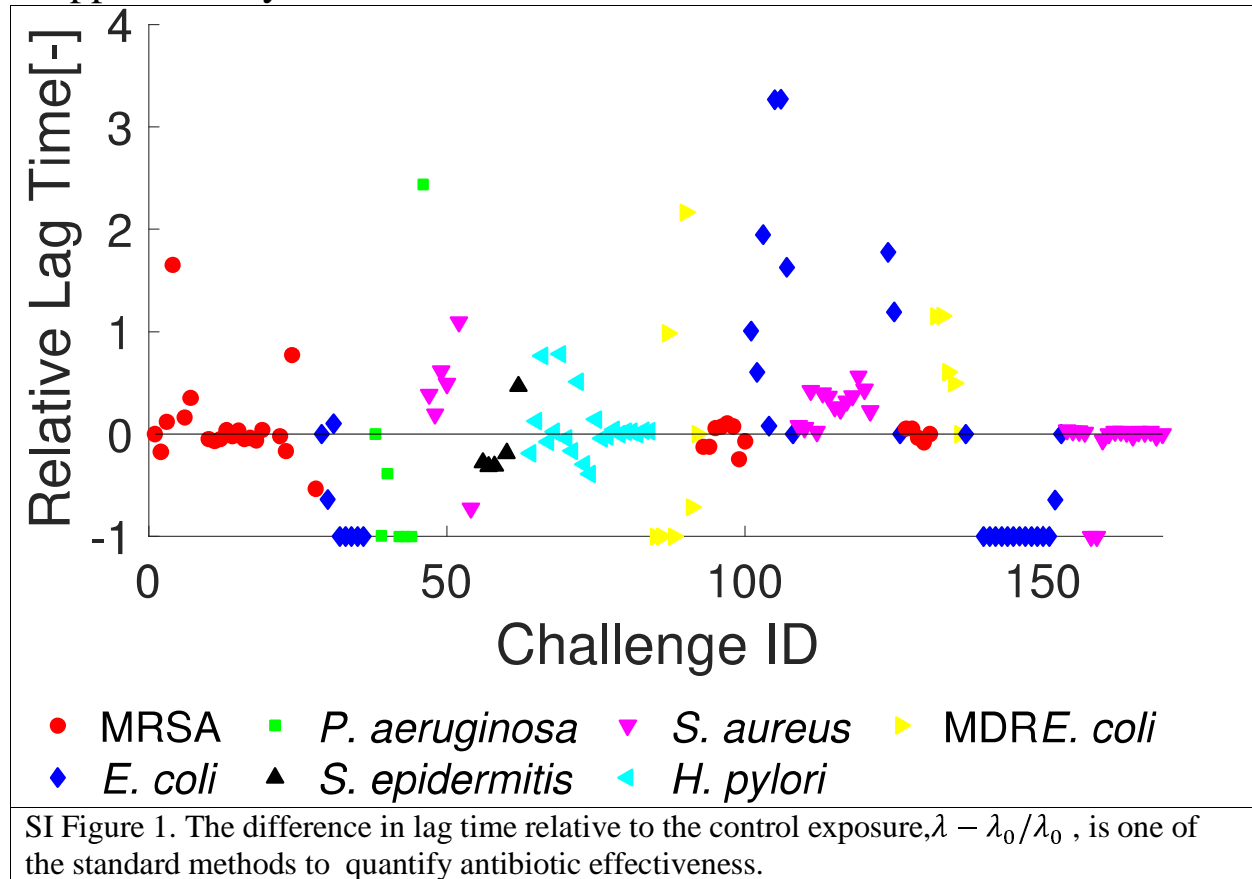

493

494

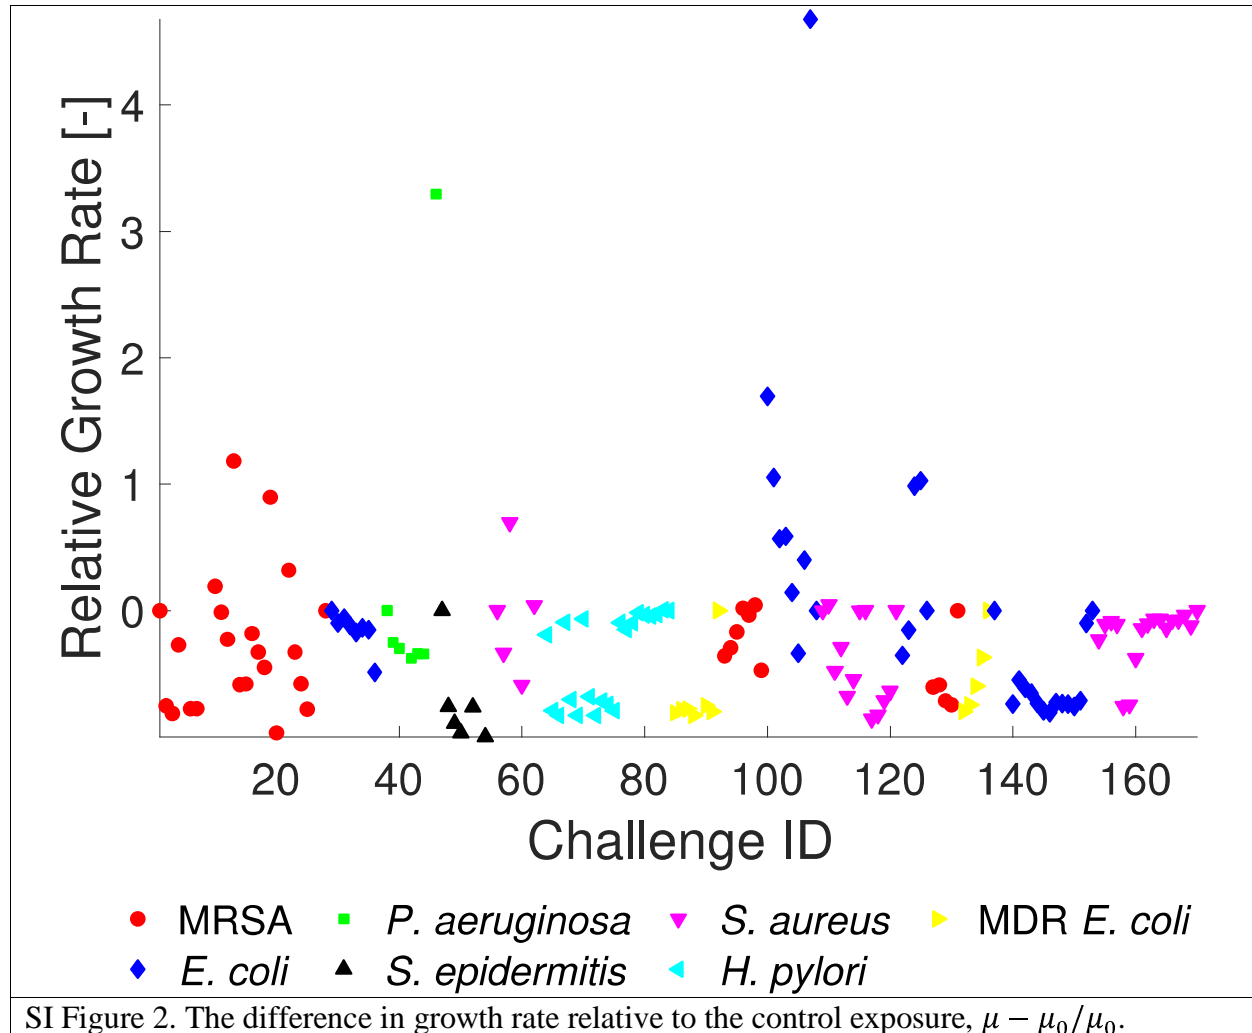



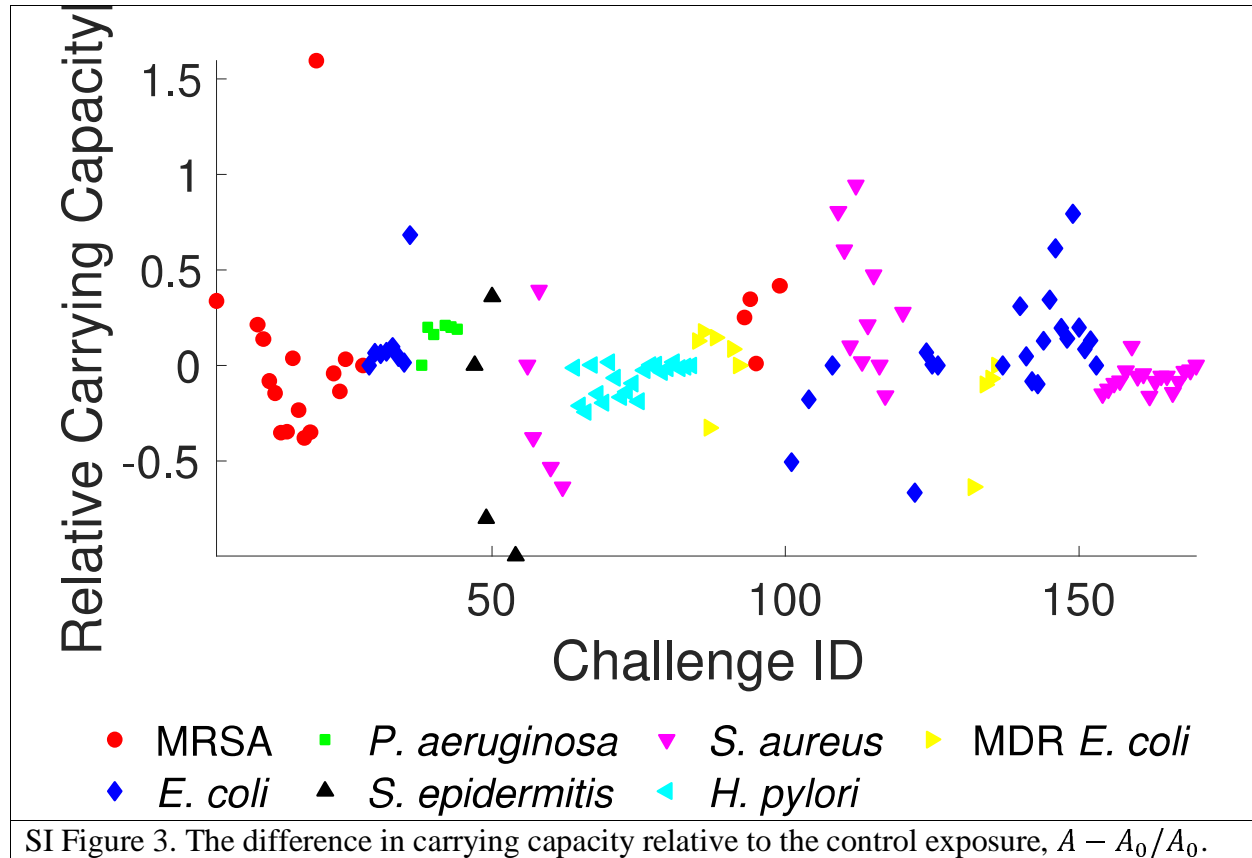

496  
497

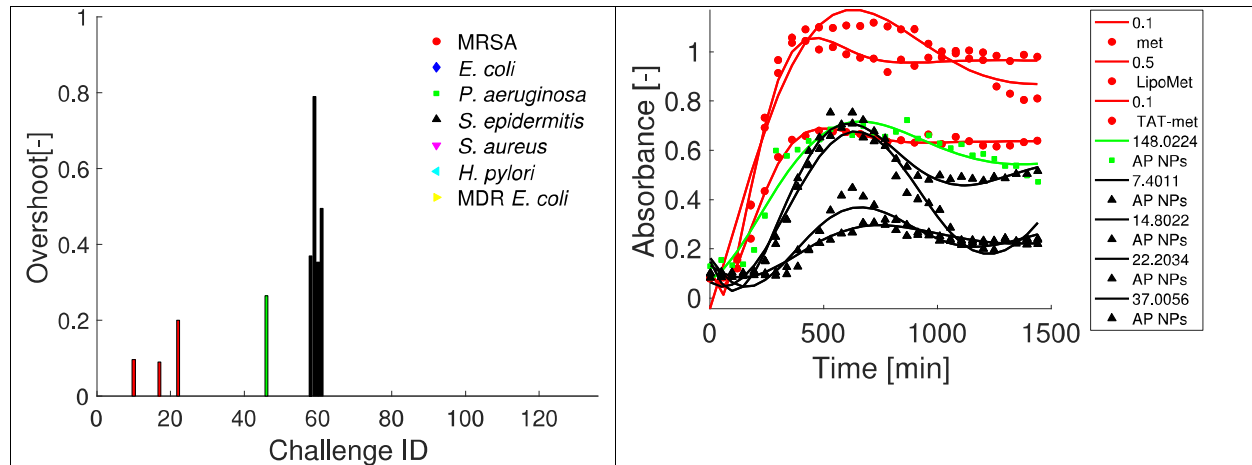

498  
499

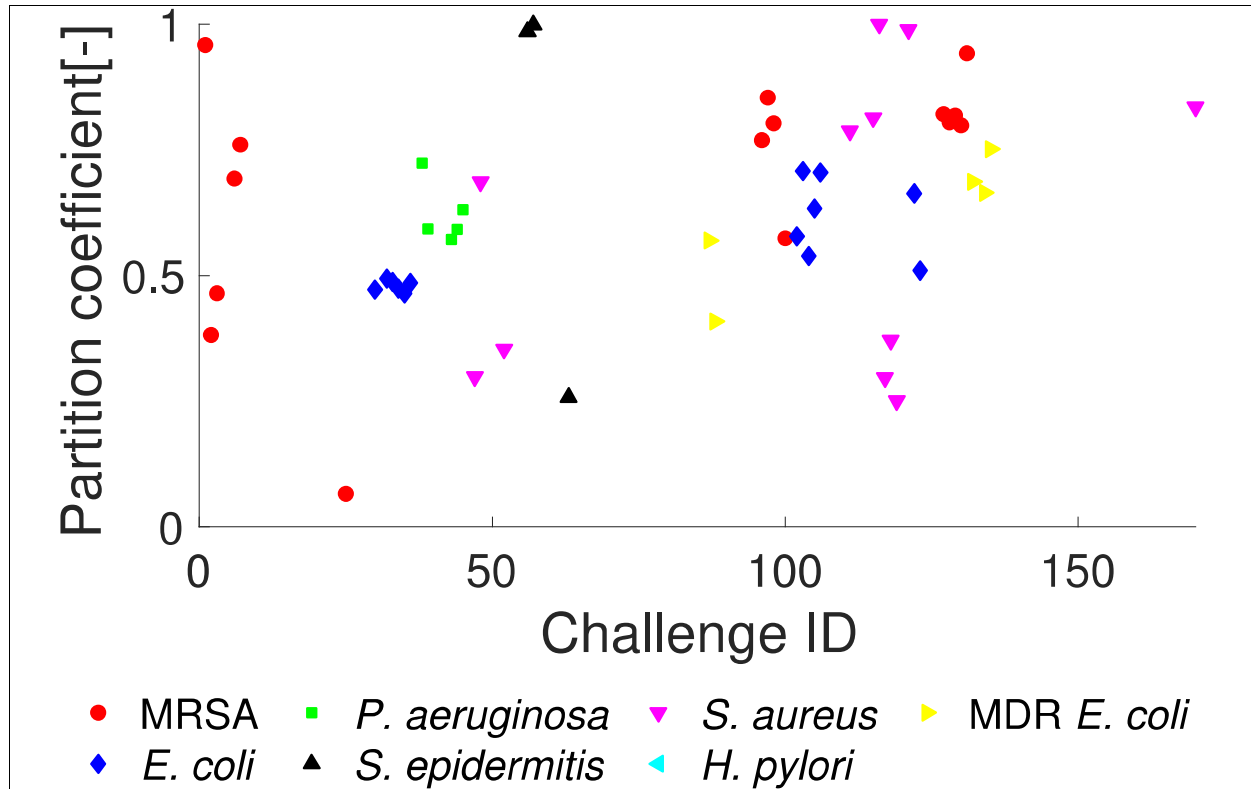

SI. Figure 5. The partition coefficient describes growth curves with 0 two-phase growth, which resembles logistic growth, to 1 secondary growth phase which also resembles logistic growth. As the seven-parameter model could produce acceptable fits, the model was constrained to those where  $\frac{t_{\alpha_2}}{t_{\beta_1}}, \frac{t_{\beta_2}}{t_{\alpha_1}} \ll 1$  in Equation 4.

500

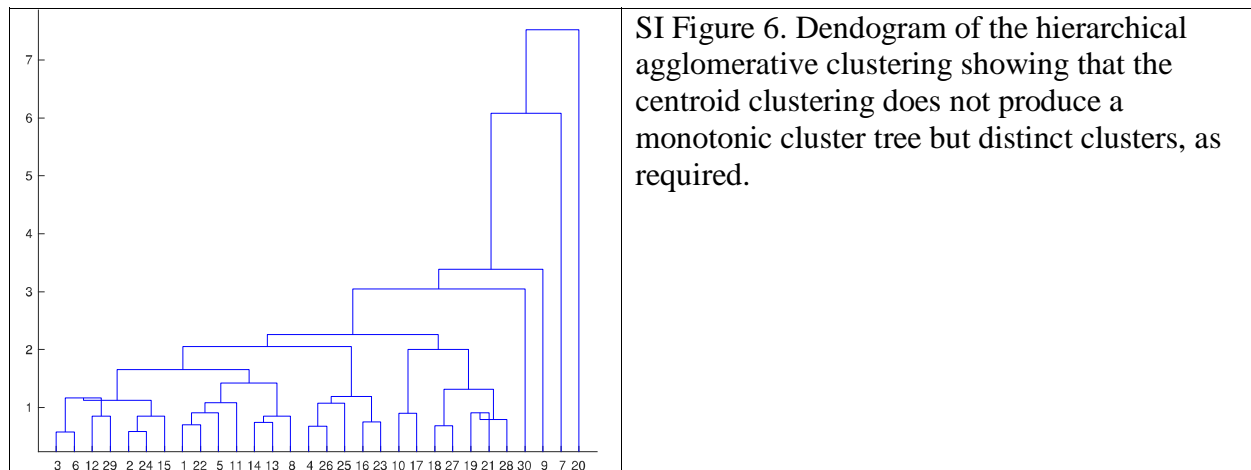

SI Figure 6. Dendrogram of the hierarchical agglomerative clustering showing that the centroid clustering does not produce a monotonic cluster tree but distinct clusters, as required.

501

| <b>EID</b> | <b>Bacteria</b>       | <b>NP</b>                                                     | <b>Concentrations (ug/mL)</b>                         |
|------------|-----------------------|---------------------------------------------------------------|-------------------------------------------------------|
| 1          | MRSA                  | Control                                                       |                                                       |
| 2          | MRSA                  | Polymersomes (PDLLA-PEG-COOH)                                 | 1000                                                  |
| 3          | MRSA                  | Polymersomes (PDLLA-PEG-COOH) (methicillin)                   | 1000                                                  |
| 4          | MRSA                  | Polymersomes (PDLLA-PEG-COOH) (Ag)                            | 1000                                                  |
| 5          | MRSA                  | Polymersomes (PDLLA-PEG-COOH) (methicillin + Ag)              | 1000                                                  |
| 6          | MRSA                  | Polymersomes (PDLLA-PEG-COOH) +PR Arginine                    | 1000                                                  |
| 7          | MRSA                  | Polymersomes (PDLLA-PEG-COOH) +PR Arginine (methicillin)      | 1000                                                  |
| 8          | MRSA                  | Polymersomes (PDLLA-PEG-COOH) +PR Arginine (Ag)               | 1000                                                  |
| 9          | MRSA                  | Polymersomes (PDLLA-PEG-COOH) +PR Arginine (methicillin + Ag) | 1000                                                  |
| 10-15      | MRSA                  | Methicillin                                                   | 0.1, 0.5, 0.9, 1.7, 3.3, 5.0                          |
| 16-21      | MRSA                  | Liposomes (methicillin)                                       | 0.1, 0.5, 0.9, 1.7, 3.3, 5.0                          |
| 22-27      | MRSA                  | Liposomes + TAT (methicillin)                                 | 0.1, 0.5, 0.9, 1.7, 3.3, 5.0                          |
| 28         | MRSA                  | Control                                                       |                                                       |
| 29         | <i>E. coli</i>        | Control                                                       |                                                       |
| 30-37      | <i>E. coli</i>        | Amphiphilic peptide                                           | 3.70, 7.40, 11.10, 14.80, 22.20, 37.01, 74.01, 148.02 |
| 38         | <i>P. aeruginosa</i>  | Control                                                       |                                                       |
| 39-46      | <i>P. aeruginosa</i>  | Amphiphilic peptide                                           | 3.70, 7.40, 11.10, 14.80, 22.20, 37.01, 74.01, 148.02 |
| 47         | <i>S. epidermidis</i> | Control                                                       |                                                       |

|                       |                       |                                                                       |                                                                |
|-----------------------|-----------------------|-----------------------------------------------------------------------|----------------------------------------------------------------|
| 48-55                 | <i>S. epidermidis</i> | Amphiphilic peptide                                                   | 3.70, 7.40, 14.80,<br>22.20, 37.01,<br>74.01, 148.02           |
| 56                    | <i>S. aureus</i>      | Control                                                               |                                                                |
| 57-63                 | <i>S. aureus</i>      | Amphiphilic peptide                                                   | 3.70, 7.40, 11.10,<br>14.80, 22.20,<br>37.01, 74.01,<br>148.02 |
| 64,67,70,7<br>376,79  | <i>H. pylori</i>      | H pylori produced SeNPs from 1 mM<br>Na <sub>2</sub> SeO <sub>3</sub> | 5 10, 25, 50, 75,<br>100                                       |
| 65,68,71,7<br>4,77,80 | <i>H. pylori</i>      | H pylori produced SeNPs from 2 mM<br>Na <sub>2</sub> SeO <sub>3</sub> | 5 10, 25, 50, 75,<br>100                                       |
| 66,69,72,7<br>5,78,81 | <i>H. pylori</i>      | H pylori produced SeNPs from 5 mM<br>Na <sub>2</sub> SeO <sub>3</sub> | 5 10, 25, 50, 75,<br>100                                       |
| 82-84                 | <i>H. pylori</i>      | Control                                                               |                                                                |
| 85-86                 | MDR <i>E. coli</i>    | Liposomes (cysteine capped AgNPs)                                     | 5, 25                                                          |
| 87-88                 | MDR <i>E. coli</i>    | Liposomes (Glutathione capped AgNPs)                                  | 5, 25                                                          |
| 89-91                 | MDR <i>E. coli</i>    | Cysteine capped AgNPs                                                 | 5, 25, 50                                                      |
| 92                    | MDR <i>E. coli</i>    | Control                                                               |                                                                |
| 93-94                 | MRSA                  | Liposomes (cysteine capped AgNPs)                                     | 5, 25                                                          |
| 95-96                 | MRSA                  | Liposomes (Glutathione capped AgNPs)                                  | 5, 25                                                          |
| 97-99                 | MRSA                  | Cysteine capped AgNPs                                                 | 5, 25, 50                                                      |
| 100                   | MRSA                  | Control                                                               |                                                                |
| 101-102               | <i>E. coli</i>        | Liposomes (cysteine capped AgNPs)                                     | 5, 25                                                          |
| 103-104               | <i>E. coli</i>        | Liposomes (glutathione capped AgNPs)                                  | 5, 25                                                          |
| 105-107               | <i>E. coli</i>        | Cysteine capped AgNPs                                                 | 5, 25, 50                                                      |
| 108                   | <i>E. coli</i>        | Control                                                               |                                                                |
| 109-110               | <i>S. aureus</i>      | Liposomes (cysteine capped AgNPs)                                     | 5, 25                                                          |
| 111-112               | <i>S. aureus</i>      | Liposomes (glutathione capped AgNPs)                                  | 5, 25                                                          |
| 113-115               | <i>S. aureus</i>      | Cysteine capped AgNPs                                                 | 5, 25, 50                                                      |
| 116                   | <i>S. aureus</i>      | Control                                                               |                                                                |
| 117-120               | <i>S. aureus</i>      | Glutathione capped AgNPs                                              | 6.9, 13.8, 69, 138                                             |
| 121                   | <i>S. aureus</i>      | Control                                                               |                                                                |
| 122-125               | <i>E. coli</i>        | Glutathione capped AgNPs                                              | 6.9, 13.8, 69, 138                                             |
| 126                   | <i>E. coli</i>        | Control                                                               |                                                                |

|           |                    |                             |                    |
|-----------|--------------------|-----------------------------|--------------------|
| 127-130   | MRSA               | Glutathione capped AgNPs    | 6.9, 13.8, 69, 138 |
| 131       | MRSA               | Control                     |                    |
| 132-135   | MDR <i>E. coli</i> | Glutathione capped AgNPs    | 6.9, 13.8, 69, 138 |
| 136       | MDR <i>E. coli</i> | Control                     |                    |
| 137 - 140 | <i>E. coli</i>     | MRSA-SeNPs                  | 250,150,75,25      |
| 141 - 144 | <i>E. coli</i>     | <i>S. aureus</i> -SeNPs     | 250,150,75,25      |
| 145 - 148 | <i>E. coli</i>     | <i>E. coli</i> -SeNPs       | 250,150,75,25      |
| 149 - 152 | <i>E. coli</i>     | <i>P. aeruginosa</i> -SeNPs | 250,150,75,25      |
| 153       | <i>E. coli</i>     | Control                     |                    |
| 154-157   | <i>S. aureus</i>   | MRSA-SeNPs                  | 250,150,75,25      |
| 158-161   | <i>S. aureus</i>   | <i>S. aureus</i> -SeNPs     | 250,150,75,25      |
| 162-165   | <i>S. aureus</i>   | <i>E. coli</i> -SeNPs       | 250,150,75,25      |
| 166-169   | <i>S. aureus</i>   | <i>P. aeruginosa</i> -SeNPs | 250,150,75,25      |
| 170       | <i>S. aureus</i>   | Control                     |                    |
